# Supplementary material
Source: MDPI journal article supplement (https://www.mdpi.com/2073-4344/11/9/1046)
Supplement: s1 [file s1]

# Supporting Information

## The Catalysis Effect of Na and Point Defect on NO Heterogeneous Adsorption on Carbon during High-Sodium Zhundong Coal Reburning: Structures, Interactions and Thermodynamic Characteristics

Xuesen Kou <sup>1</sup>, Jing Jin <sup>1,\*</sup>, Yongzhen Wang <sup>2,\*</sup>, Yanhui Li <sup>3</sup> and Fengxiao Hou <sup>4</sup>

<sup>1</sup> School of Energy and Power Engineering, University of Shanghai for Science and Technology, Shanghai 200093, China; sdlykouxuesen@163.com

<sup>2</sup> School of Civil Engineering and Architecture, Linyi University, Linyi 276000, China

<sup>3</sup> Key Laboratory of Thermo-Fluid Science and Engineering of MOE, School of Energy and Power Engineering, Xi'an Jiaotong University, Xi'an 710049, China; yhli19@mail.xjtu.edu.cn

<sup>4</sup> School of Energy and Power Engineering, North University of China, Taiyuan 030051, China; mercatushou@outlook.com

\* Correspondence: alicejin@usst.edu.cn (J.J.); wangyongzhen@lyu.edu.cn (Y.W.)

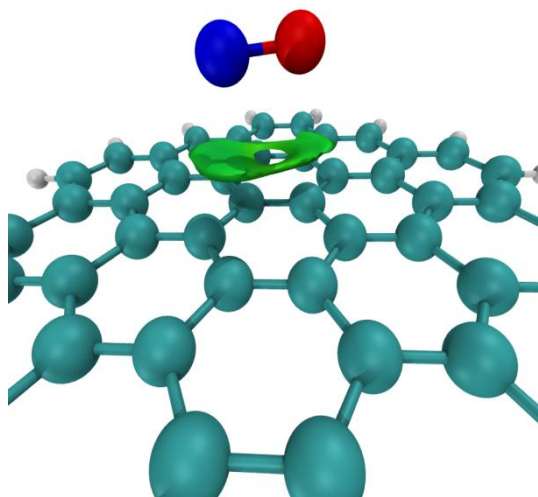

(a)

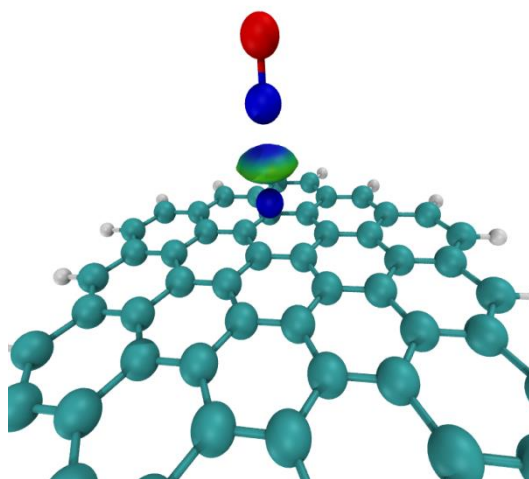

(b)

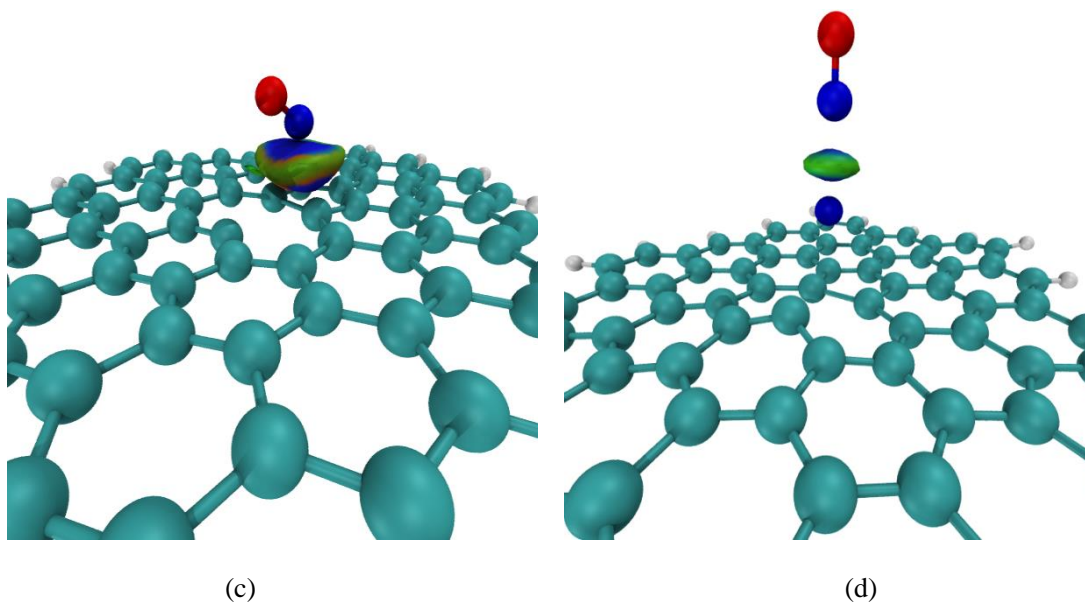

Figure S1. The optimized structures at (a) graphene-NO, (b) graphene-Na-NO, (c) gsv-NO, (d) gsv-Na-NO.
